# Supplementary material for: Prognostic factors for mortality, ICU, MIS-C and hospital admission due to SARS-CoV-2 in paediatric patients: A systematic review and meta-analysis
Source: bioRxiv or medRxiv preprint supplement (doi:10.1101/2024.02.23.23298451), 2024-02-24
Supplement: Supplementary file [file media-1.pdf]

## APPENDIX 1 – Search Strategy

### Ovid MEDLINE(R) ALL <1946 to February 14, 2022>

1 exp coronavirus/ or exp Coronavirus disease 2019/ or exp coronavirus infections/ 157801  
2 Coronaviridae Infections/ or Coronaviridae/ or SARS-CoV-2/ or COVID-19/ 143620  
3 (("2019" adj (novel or new) adj corona\*) or ("2019" adj (CoV or nCoV)) or (coronavirus adj (disease adj  
"2019")) or COVID19 or COVID-19 or ((Novel or New) adj Corona\*) or SARS2 or SARS-CoV-2 or (SARS adj2  
(coronaviridae or coronavirus)) or ((sars or Coronavirus) adj "2") or nCov or 2019ncov or (severe adj acute adj  
respiratory adj syndrome) or SARs or Sars-cov or ((sars-associated or sars-related) adj (cov or coronavirus))).mp.  
238966  
4 Betacoronavirus 1/ or Betacoronavirus/ 33290  
5 or/1-4 249740  
6 exp cohort analysis/ 2296421  
7 exp longitudinal study/ 155295  
8 exp prospective study/ 615095  
9 cohort\*.tw. 729143  
10 "controlled clinical trial".pt. 94698  
11 or/6-10 2690715  
12 exp mortality/ 414881  
13 exp hospital mortality/ 47011  
14 Death/ or death\*.mp. 1021755  
15 all-cause death.mp. 6648  
16 all-cause mortality.mp. 43077  
17 exp hospitalization/ 273986  
18 exp patient admission/ 25933  
19 exp patient readmission/ 21035  
20 mortality.mp. 1292756  
21 (died or fatal or decrease\* or non-survivor or non-survival or survival).mp. 4103283  
22 (recovered or discharge\* or alive or non-fatal or nonfatal or survivor).mp. 576672  
23 ("hospital stay\*" or "patient readmission" or "patient admission" or utilisation or utilization or morbidity or  
"hospital care" or "hospital treatment").mp. 816108  
24 exp tidal volume/ or LPVS.mp. or "pressure\* adj3 limited\*".mp. or "protective adj3 ventillation".mp. or exp  
respiration, artificial/ or ALI.mp. or ARDS.mp. 110886  
25 respiratory disease syndrome/ or adult respiratory distress syndrome/ or acute lung injury/ or acute  
respiratory distress syndrome/ or "tidal volume".mp. 46023  
26 ((intensive or critical) adj1 care).mp. 247626  
27 exp intensive care units/ or exp intensive care/ or ICU.mp. or exp critical care/ 181298  
28 critical illness.mp. or exp critical illness/ 40709  
29 ("mechanical ventillation" or "mechanical ventilation").mp. 51160  
30 ITU.mp. 1029  
31 intensive therapy unit.mp. 548  
32 Systemic Inflammatory Response Syndrome/ 6671  
33 ((multisystem\* or multi-system\*) and inflammat\* and syndrome\*).mp. 3083  
34 or/12-336346617  
35 (young\* or infant\* or baby or babies or pediatri\* or paediatr\* or newborn\* or neonat\*).mp. 3302667  
36 Infant, Newborn/ or Infant/ 1204221  
37 (toddler\* or preschool\* or child\* or pediat\* or paediat\* or kid or kids or prepubescen\* or prepuberty\* or  
puberty or pubescen\* or teen\* or young\* or youth\* or minors\* or under ag\* or underag\* or juvenile\* or girl\* or  
boy\* or preadolesc\* or adolesc\* or nursery or prekindergarten or kindergarten\* or early childhood education or  
preschool\* or elementary education or elementary school\* or primary education or primary school\* or K-12\* or K12  
or 1st-grade\* or first-grade\* or grade 1 or grade one or 2nd-grade\* or second-grade\* or grade 2 or grade two or

3rd-grade\* or third-grade\* or grade 3 or grade three or 4th-grade\* or fourth-grade\* or grade 4 or grade four or 5th-grade\* or fifth-grade\* or grade 5 or grade five or 6th-grade\* or sixth-grade\* or grade 6 or grade six or intermediate general or middle school\* or secondary education or secondary school\*OR 7th-grade\* or seventh-grade\* or grade 7 or grade seven or 8th-grade\* or eight-grade\* or grade 8 or grade eight or 9th-grade\* or ninth-grade\* or grade 9 or grade nine or 10th-grade\* or tenth-grade\* or grade 10 or grade ten or 11th-grade\* or eleventh-grade\* or grade 11 or grade eleven or 12th-grade\* or twelfth-grade\* or grade 12 or grade twelve or junior high\* or highschool\* or high school\* or preuniversity or pre-university or college\* or tertiary education or tertiary school\*OR postsecondary education or postsecondary school\* or prevocational or vocational or classroom\* or curricul\* or education\* or learner\* or lesson\* or pupil\* or school\* or student\*).ti,ab,kf. 3682573

38 toddlers/ or preschool children/ or young children/ or children/ or pediatrics/ or preadolescents/ or youth/ or adolescents/ or early adolescents/ or late adolescents/ or nursery schools/ or kindergarten/ or early childhood education/ or preschool education/ or preschool teachers/ or elementary secondary education/ or grade 1/ or grade 2/ or grade 3/ or grade 4/ or grade 5/ or grade 6/ or grade 7/ or grade 8/ or grade 9/ or grade 10/ or grade 11/ or grade 12/ or elementary education/ or elementary schools/ or elementary school students/ or elementary school teachers/ or primary education/ or public schools/ or public school teachers/ or middle schools/ or middle school students/ or junior high schools/ or junior high school students/ or secondary education/ or secondary schools/ or secondary school students/ or secondary school teachers/ or high schools/ or high school students/ or college students/ or colleges/ or two year college students/ or two year college students/ or vocational education/ or vocational schools/ or students/ 3306537

39 or/35-375266221

40 5 and 34 and 39 17177

41 limit 40 to yr="2020 -Current" 16221

42 limit 40 to yr="2021 -Current" 11389

43 41 and 11 4073

44 42 and 11 2923

#### Embase <1974 to 2022 February 11>

1 exp coronavirus/ or exp Coronavirus disease 2019/ or exp coronavirus infections/ 228287

2 Coronaviridae Infections/ or Coronaviridae/ or SARS-CoV-2/ or COVID-19/ 65502

3 (("2019" adj (novel or new) adj corona\*) or ("2019" adj (CoV or nCoV)) or (coronavirus adj (disease adj "2019")) or COVID19 or COVID-19 or ((Novel or New) adj Corona\*) or SARS2 or SARS-CoV-2 or (SARS adj2 (coronaviridae or coronavirus)) or ((sars or Coronavirus) adj "2") or nCov or 2019ncov or (severe adj acute adj respiratory adj syndrome) or SARs or Sars-cov or ((sars-associated or sars-related) adj (cov or coronavirus))).mp. 260847

4 Betacoronavirus/ or Severe acute respiratory syndrome coronavirus 2/62058

5 or/1-4 271260

6 exp cohort analysis/ 805632

7 exp longitudinal study/ 167923

8 exp prospective study/ 744821

9 exp follow up/ 1797734

10 cohort\*.tw. 1227355

11 or/6-10 3391287

12 exp mortality/ 1221437

13 exp hospital mortality/ 48075

14 death\*.mp. 1547529

15 all-cause mortality.mp. 90249

16 all-cause death\*.mp. 13053

17 exp hospitalization/ 443756

18 exp patient admission/ 233236

19 exp patient readmission/ 80523

20 exp death/ 765079

21 (mortality or died or fatal or decease\* or non-survivor or "non survivor").mp. [mp=title, abstract, heading word, drug trade name, original title, device manufacturer, drug manufacturer, device trade name, keyword heading word, floating subheading word, candidate term word] 2107598

22 (recovered or discharge\* or alive or non-fatal or nonfatal or survivor).mp. 968702

23 respiratory distress syndrome, adult/ 26483

24 ((acute adj lung adj injury) or (shock adj lung) or ARDS).mp. [mp=title, abstract, heading word, drug trade name, original title, device manufacturer, drug manufacturer, device trade name, keyword heading word, floating subheading word, candidate term word] 51099

25 ((acute or adult) and (respiratory adj distress)).mp. 81963

26 ((intensive or critical) adj1 care).mp. 431955

27 exp intensive care units/ 239264

28 exp intensive care/ 755681

29 exp critical care/ 755681

30 ("critical illness" or ICU or ITU or "intensive therapy unit").mp.176416

31 exp critical illness/ 32903

32 ("mechanical ventilillation" or "mechanical ventilation").mp. 84228

33 systemic inflammatory response syndrome/13839

34 ((multisystem\* or multi-system\*) and inflammat\* and syndrome\*).mp. 4270

35 or/12-345003787

36 (young\* or infant\* or baby or babies or pediatri\* or paediatr\* or newborn\* or neonat\*).mp. 3199626

37 infant/ 643730

38 newborn/ 563566

39 (toddler\* or preschool\* or child\* or pediat\* or paediat\* or kid or kids or prepubescen\* or prepuberty\* or puberty or pubescen\* or teen\* or young\* or youth\* or minors\* or under ag\* or underag\* or juvenile\* or girl\* or boy\* or preadolesc\* or adolesc\* or nursery or prekindergarten or kindergarten\* or early childhood education or preschool\* or elementary education or elementary school\* or primary education or primary school\* or K-12\* or K12 or 1st-grade\* or first-grade\* or grade 1 or grade one or 2nd-grade\* or second-grade\* or grade 2 or grade two or 3rd-grade\* or third-grade\* or grade 3 or grade three or 4th-grade\* or fourth-grade\* or grade 4 or grade four or 5th-grade\* or fifth-grade\* or grade 5 or grade five or 6th-grade\* or sixth-grade\* or grade 6 or grade six or intermediate general or middle school\* or secondary education or secondary school\* or 7th-grade\* or seventh-grade\* or grade 7 or grade seven or 8th-grade\* or eight-grade\* or grade 8 or grade eight or 9th-grade\* or ninth-grade\* or grade 9 or grade nine or 10th-grade\* or tenth-grade\* or grade 10 or grade ten or 11th-grade\* or eleventh-grade\* or grade 11 or grade eleven or 12th-grade\* or twelfth-grade\* or grade 12 or grade twelve or junior high\* or highschool\* or high school\* or preuniversity or pre-university or college\* or tertiary education or tertiary school\* or postsecondary education or postsecondary school\* or prevocational or vocational or classroom\* or curricul\* or education\* or learner\* or lesson\* or pupil\* or school\* or student\*).ti,ab,kf. 4754660

40 toddler/ or preschool child/ or child/ or pediatrics/ or juvenile/ or adolescent/ or nursery school/ or kindergarten/ or preschool child/ or primary education/ or secondary education/ or tertiary education/ or school child/ or middle school student/ or high school student/ or primary school/ or high school/ or high school graduate/ or school/ or college/ or college student/ 3214676

41 or/36-406804496

42 5 and 35 and 41 21530

43 limit 42 to yr="2020 -Current" 20211

44 limit 42 to yr="2021 -Current" 13762

45 43 and 11 5247

46 44 and 11 3885
